# Supplementary material for: Photocontrolled bromine–iodine transformation reversible-deactivation radical polymerization: facile synthesis of star copolymers and unimolecular micelles
Source: Royal Society of Chemistry journal article supplement (doi:10.1039/d1py00006c), 2021-01-01
Supplement: d1py00006c1.pdf [file d1py00006c1.pdf]

## Supporting Information

### Photocontrolled Bromine-Iodine Transformation Reversible-Deactivation Radical Polymerization: Facile Synthesis of Star Copolymers and Unimolecular Micelles

Haihui Li, Haitao Zhao, Lan Yao, Lifen Zhang,\* Zhenping Cheng,\* Xiulin Zhu

Suzhou key Laboratory of Macromolecular Design and Precision Synthesis, Jiangsu Key Laboratory of Advanced Functional Polymer Design and Application; State and Local Joint Engineering Laboratory for Novel Functional Polymeric Materials; College of Chemistry, Chemical Engineering and Materials Science, Soochow University, Suzhou 215123, China. E-mail: [chengzhenping@suda.edu.cn](mailto:chengzhenping@suda.edu.cn) (Z. P. Cheng), [zhanglifen@suda.edu.cn](mailto:zhanglifen@suda.edu.cn) (L. F. Zhang)

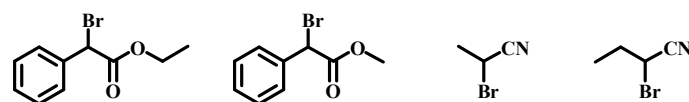

**Scheme S1.** The structure types of the initiator precursor which are suitable for BIT-RDRP.

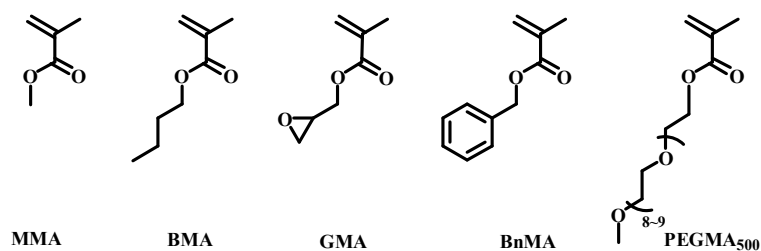

**Scheme S2.** The chemical structures of monomers used in this work.

**Table S1.** <sup>a</sup>Polymerization of MMA.

| Entry | Wavelength (nm) | t (h) | Solvent                         | R          | <sup>b</sup> Conv. (%) | $M_{n,th}$ (g/mol) | <sup>c</sup> $M_{n,GPC}$ (g/mol) | $\mathcal{D}$ |
|-------|-----------------|-------|---------------------------------|------------|------------------------|--------------------|----------------------------------|---------------|
| 1     | 660             | 24    | CH <sub>2</sub> Cl <sub>2</sub> | 400/1/8/2  | 88.7                   | 36800              | 48700                            | 1.33          |
| 2     | 460             | 24    | CH <sub>2</sub> Cl <sub>2</sub> | 400/1/8/2  | 92.3                   | 38300              | 55300                            | 1.21          |
| 3     | 660             | 24    | DMF                             | 200/1/8/2  | 90.8                   | 19700              | 29800                            | 1.11          |
| 4     | 660             | 24    | DMF                             | 200/1/8/0  | 65.5                   | 14600              | 20200                            | 1.08          |
| 5     | 660             | 24    | DMF                             | 50/1/8/2   | 89.7                   | 6000               | 9200                             | 1.59          |
| 6     | 660             | 24    | DMF                             | 400/1/8/2  | 84.3                   | 35200              | 51400                            | 1.47          |
| 7     | 460             | 14    | DMF                             | 100/1/8/2  | 44.7                   | 5900               | 8300                             | 1.14          |
| 8     | 460             | 14    | DMF                             | 200/1/8/2  | 49.4                   | 11400              | 21900                            | 1.18          |
| 9     | 460             | 14    | DMF                             | 400/1/8/2  | 54.4                   | 23300              | 37800                            | 1.14          |
| 10    | 460             | 24    | DMSO                            | 400/1/8/2  | 80.8                   | 33800              | 54400                            | 1.70          |
| 11    | 460             | 24    | toluene                         | 400/1/8/2  | 49.1                   | 21100              | 25200                            | 1.22          |
| 12    | 460             | 24    | toluene                         | 400/1/8/4  | 21.5                   | 10100              | 32300                            | 1.47          |
| 13    | 460             | 14    | DMF                             | 100/1/12/2 | 64.0                   | 7900               | 5100                             | 1.16          |
| 14    | 460             | 14    | DMF                             | 200/1/12/2 | 78.5                   | 14200              | 21900                            | 1.19          |
| 15    | 460             | 14    | DMF                             | 400/1/12/2 | 69.3                   | 29200              | 33400                            | 1.20          |

<sup>a</sup>Polymerization conditions: R = [MMA]<sub>0</sub>/[THPP-4Br]<sub>0</sub>/[NaI]<sub>0</sub>/[TEA]<sub>0</sub>,  $V_{MMA} = 0.3$  mL,  $V_{Solvent} = 0.6$  mL, under irradiation with red LED light ( $\lambda_{max} = 660$  nm, 32.8 mW/cm<sup>2</sup>) or blue LED light ( $\lambda_{max} = 460$  nm, 15 mW/cm<sup>2</sup>) at 25 °C. <sup>b</sup>Determined by gravimetry. <sup>c</sup>Determined by GPC using linear PMMA as the standard in THF.

**Table S2.** <sup>a</sup>Polymerization of PEGMA<sub>500</sub>.

| Entry | t (h) | Solvent  | R         | <sup>b</sup> Conv. (%) | <i>M</i> <sub>n,th</sub> (g/mol) | <sup>c</sup> <i>M</i> <sub>n,GPC</sub> (g/mol) | <sup>c</sup> <i>D</i> |
|-------|-------|----------|-----------|------------------------|----------------------------------|------------------------------------------------|-----------------------|
| 1     | 12    | Methanol | 20/1/12/2 | 45.8                   | 6000                             | 15800                                          | 1.31                  |
| 2     | 8     | DMF      | 80/1/12/2 | 24.8                   | 11400                            | 71200                                          | 1.75                  |
| 3     | 8     | DMSO     | 80/1/12/2 | 39.2                   | 17100                            | 80800                                          | 1.30                  |
| 4     | 12    | Anisole  | 80/1/12/2 | 21.6                   | 10100                            | 22700                                          | 1.16                  |
| 5     | 12    | Acetone  | 80/1/12/2 | 52.5                   | 22500                            | 59300                                          | 1.55                  |
| 6     | 12    | Dioxane  | 80/1/12/2 | 27.4                   | 12400                            | 33000                                          | 1.27                  |
| 7     | 12    | Ethanol  | 20/1/12/2 | 88.7                   | 10300                            | 12200                                          | 1.31                  |
| 8     | 12    | Ethanol  | 40/1/12/2 | 72.4                   | 15900                            | 17300                                          | 1.24                  |
| 9     | 12    | Ethanol  | 80/1/12/2 | 75.6                   | 31700                            | 34100                                          | 1.27                  |

<sup>a</sup>Polymerization conditions: R = [PEGMA]<sub>0</sub>/[THPP-4Br]<sub>0</sub>/[NaI]<sub>0</sub>/[TEA]<sub>0</sub>, *V*<sub>PEGMA</sub> = 0.3 mL, *V*<sub>Solvent</sub> = 0.6 mL, under irradiation with blue LED light ( $\lambda_{\max}$  = 460 nm, 15 mW/cm<sup>2</sup>) at 25 °C. <sup>b</sup>Determined by gravimetry. <sup>c</sup>Determined by GPC using linear PMMA as the standard in THF.

**Table S3** <sup>a</sup>Polymerization of PEGMA<sub>500</sub> by using linear PMMA as the macroinitiator.

| Entry | t (h) | <i>M</i> <sub>n,PMMA</sub> (g/mol) | R           | <sup>b</sup> <i>M</i> <sub>n,GPC</sub> (g/mol) | <sup>c</sup> <i>M</i> <sub>n,NMR</sub> (g/mol) | <sup>b</sup> <i>D</i> | <sup>d</sup> BR                                      |
|-------|-------|------------------------------------|-------------|------------------------------------------------|------------------------------------------------|-----------------------|------------------------------------------------------|
| 1     | 72    | 11500                              | 400/1/3/0.5 | 40400                                          | 43300                                          | 1.23                  | PMMA <sub>112</sub> - <i>b</i> -PPEGMA <sub>64</sub> |
| 2     | 72    | 15000                              | 400/1/3/0.5 | 30500                                          | 32800                                          | 1.29                  | PMMA <sub>147</sub> - <i>b</i> -PPEGMA <sub>36</sub> |
| 3     | 72    | 18000                              | 400/1/3/0.5 | 42400                                          | 44100                                          | 1.32                  | PMMA <sub>177</sub> - <i>b</i> -PPEGMA <sub>52</sub> |

<sup>a</sup>Polymerization conditions: R = [PEGMA]<sub>0</sub>/[PMMA]<sub>0</sub>/[NaI]<sub>0</sub>/[TEA]<sub>0</sub>, *V*<sub>PEGMA<sub>500</sub></sub> = 0.5 mL, *V*<sub>C<sub>2</sub>H<sub>5</sub>OH</sub> = 1.0 mL, under irradiation with blue LED light ( $\lambda_{\max}$  = 460 nm, 15 mW/cm<sup>2</sup>) at 25 °C. <sup>b</sup>Determined by GPC using linear PMMA as the standard in THF. <sup>c</sup>Calculated by <sup>1</sup>H NMR results. <sup>d</sup>Block ratio of amphiphilic linear block copolymers calculated from <sup>1</sup>H NMR results.

**Table S4** Estimation of the hydrodynamic radius of UIM.

| Entry | BR                                                          | <sup>a</sup> <i>R<sub>C</sub></i> (nm) | <sup>b</sup> <i>R<sub>O</sub></i> (nm) | <sup>c</sup> <i>R<sub>S</sub></i> (nm) |
|-------|-------------------------------------------------------------|----------------------------------------|----------------------------------------|----------------------------------------|
| 1     | THPP-4PMMA <sub>93</sub> - <i>b</i> -4PPEGMA <sub>66</sub>  | 1.3                                    | 8.3                                    | 7.0                                    |
| 2     | THPP-4PMMA <sub>115</sub> - <i>b</i> -4PPEGMA <sub>63</sub> | 1.4                                    | 9.1                                    | 7.7                                    |
| 3     | THPP-4PMMA <sub>167</sub> - <i>b</i> -4PPEGMA <sub>62</sub> | 1.4                                    | 10.6                                   | 9.2                                    |
| 4     | THPP-4PMMA <sub>105</sub> - <i>b</i> -4PPEGMA <sub>52</sub> | 1.4                                    | 8.6                                    | 7.2                                    |
| 8     | THPP-4PMMA <sub>131</sub> - <i>b</i> -4PPEGMA <sub>66</sub> | 1.4                                    | 9.6                                    | 8.2                                    |
| 10    | THPP-4PMMA <sub>158</sub> - <i>b</i> -4PPEGMA <sub>50</sub> | 1.4                                    | 10.2                                   | 8.8                                    |
| 11    | THPP-4PMMA <sub>158</sub> - <i>b</i> -4PPEGMA <sub>71</sub> | 1.4                                    | 10.4                                   | 9.0                                    |
| 13    | THPP-4PMMA <sub>171</sub> - <i>b</i> -4PPEGMA <sub>56</sub> | 1.4                                    | 10.6                                   | 9.2                                    |
| 14    | THPP-4PMMA <sub>171</sub> - <i>b</i> -4PPEGMA <sub>66</sub> | 1.4                                    | 10.7                                   | 9.3                                    |

<sup>a</sup>The hydrodynamic radius of the core,  $R_C = N_B^{0.065}$ . <sup>b</sup>The hydrodynamic radius of the overall micelle,  $R_O = N_B^{0.408}N_A^{0.065}$ . <sup>c</sup>The hydrodynamic radius of the shell,  $R_S = R_O - R_C$ .  $N_B$  and  $N_A$  are respectively the polymerization degree of the hydrophobic and hydrophilic segments of the star block copolymer.

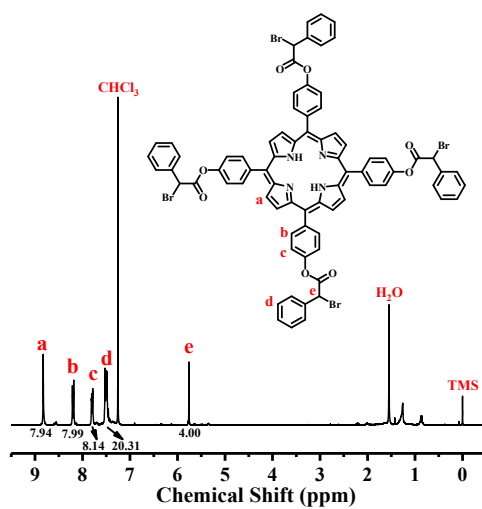

Figure S1.  $^1\text{H}$  NMR spectrum of THPP-4Br in  $\text{CDCl}_3$ .

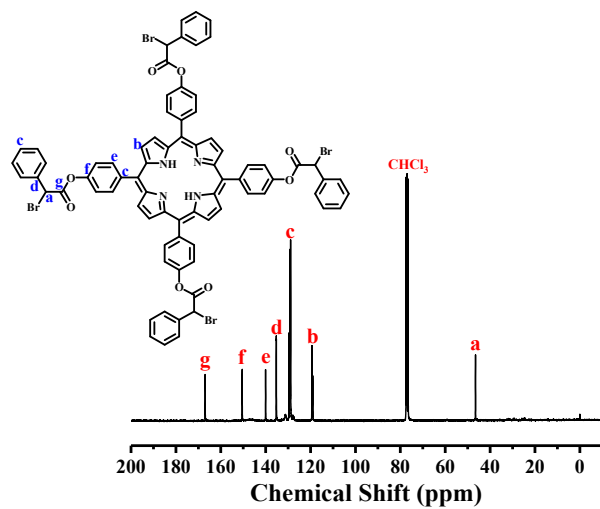

Figure S2.  $^{13}\text{C}$  NMR spectrum of THPP-4Br in  $\text{CDCl}_3$ .

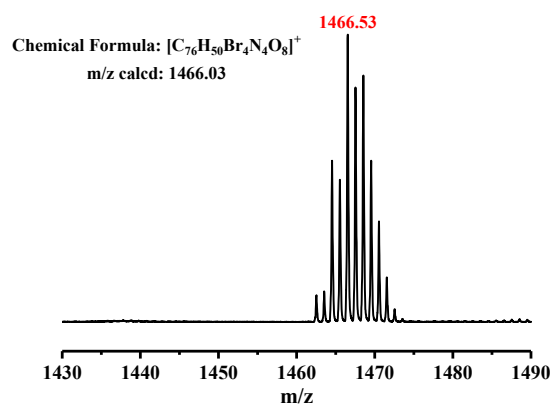

Figure S3. MALDI-TOF MS spectrum of THPP-4Br in  $\text{CHCl}_3$ .

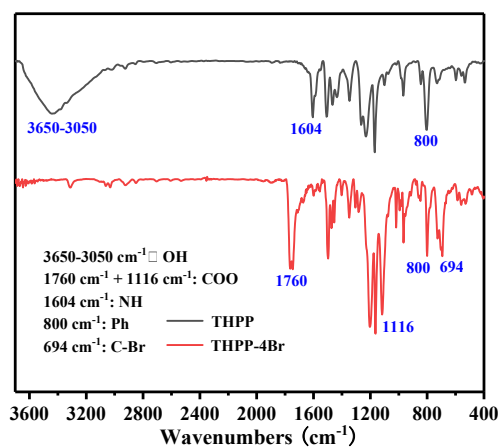

Figure S4. FT-IR spectra of THPP and THPP-4Br.

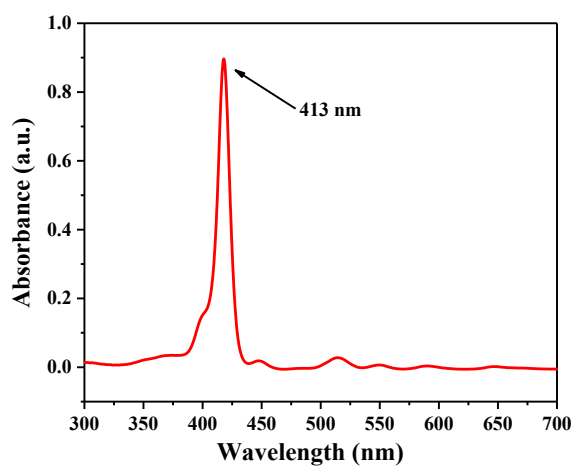

Figure S5. UV-vis absorption spectrum of THPP-4Br.

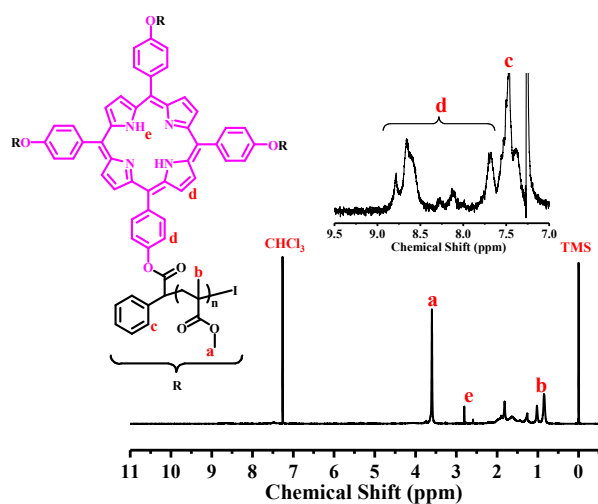

Figure S6. <sup>1</sup>H NMR spectrum of THPP-4PMMA ( $M_{n, GPC} = 14600$  g/mol,  $D = 1.22$ ) in CDCl<sub>3</sub>.

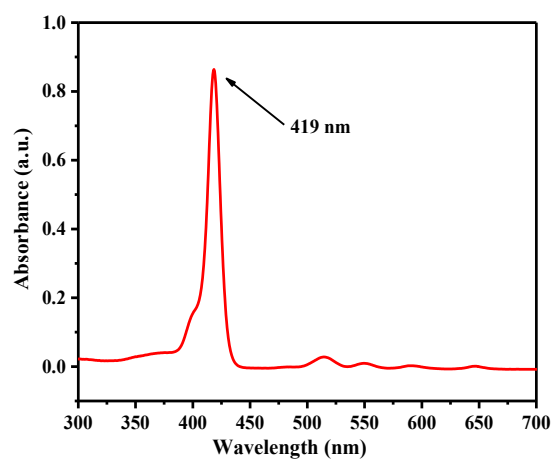

**Figure S7.** UV-vis absorption spectrum of THPP-4PMMA ( $M_{n,NMR} = 14600$  g/mol,  $D = 1.22$ ).

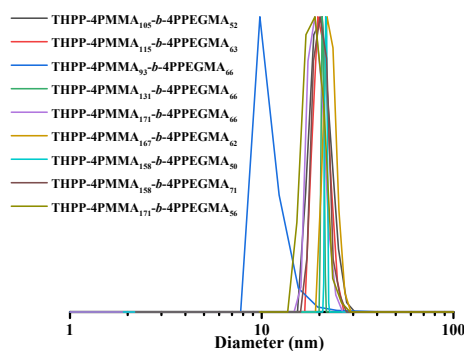

**Figure S8.** Size distributions from DLS of star copolymer THPP-4PMMA-*b*-4PPEGMA micelles.

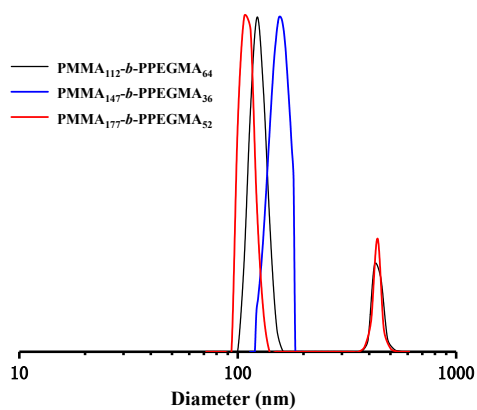

**Figure S9.** Size distributions from DLS of amphiphilic linear block copolymer PMMA-*b*-PPEGMA micelles.

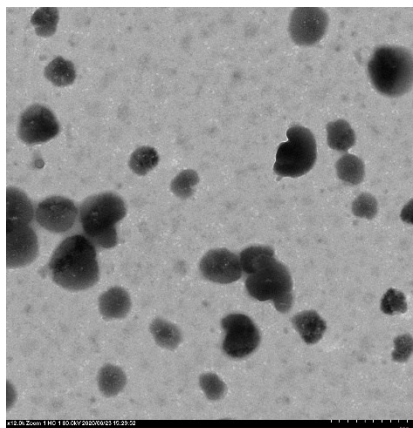

**Figure S10.** TEM image of the amphiphilic linear block copolymer PMMA-*b*-PPEGMA micelles. Sample: PMMA<sub>112</sub>-*b*-PPEGMA<sub>64</sub>,  $M_{n,GPC} = 40400$  g/mol,  $M_{n,NMR} = 43300$  g/mol,  $D = 1.23$ .

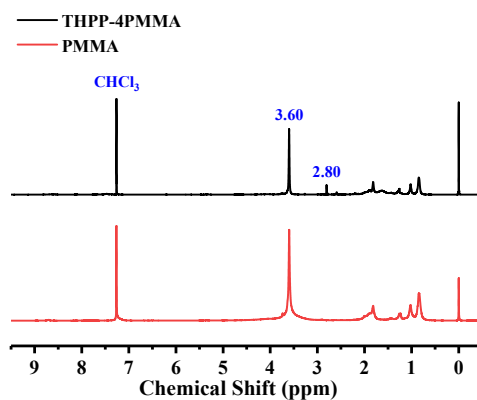

**Figure S11.** <sup>1</sup>H NMR spectra of THPP-4PMMA ( $M_{n,GPC} = 14600$  g/mol,  $D = 1.22$ ) and linear PMMA ( $M_{n,GPC} = 4100$  g/mol,  $D = 1.09$ ) in CDCl<sub>3</sub>.

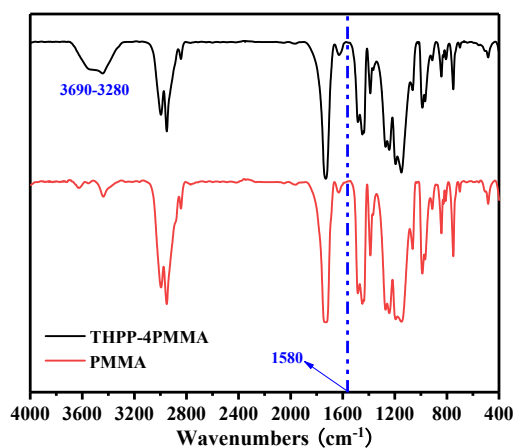

**Figure S12.** FT-IR Spectra of THPP-4PMMA ( $M_{n,GPC} = 14600$  g/mol,  $D = 1.22$ ) and linear PMMA ( $M_{n,GPC} = 4100$  g/mol,  $D = 1.09$ ).



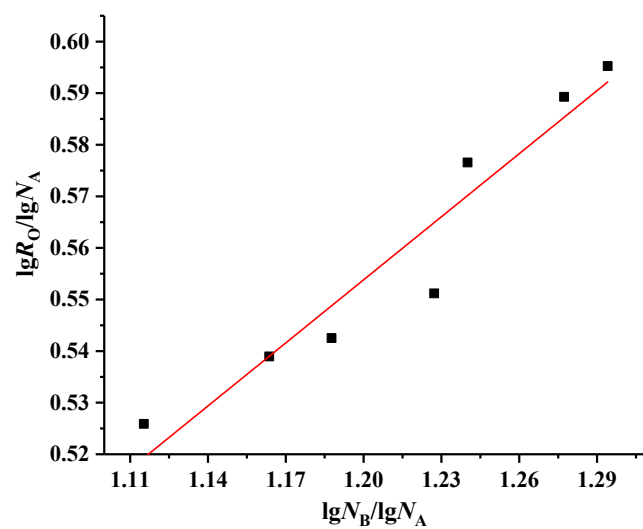

**Figure S13.**  $\lg R_O / \lg N_A$  as a function of  $\lg N_B / \lg N_A$ .
